# Supplementary material for: DNA methylation changes induced by long and short photoperiods in Nasonia
Source: PubMed Central journal article supplement (PMC4728373; doi:10.1101/gr.196204.115), 2016-02

# The seasonal epigenome: Snapshots of DNA methylation changes between long and short photoperiods in *Nasonia*

Mirko Pegoraro, Akanksha Bafna, Nathaniel J. Davies, David M. Shuker, and Eran Tauber

## Supplementary Material

**Table S1.** Top differentially methylated CpG sites ( $q < 0.05$ ). For each site, the difference in methylation level in LD relative to SD (5mC  $\Delta$ ) and Fisher's exact test FDR (q-value) are shown.

| Gene name    | Gene ID | 5mC $\Delta$ | q-value   | NCBI full name                                                                        |
|--------------|---------|--------------|-----------|---------------------------------------------------------------------------------------|
| LOC100123268 | NV11549 | -77.59       | 5.30E-007 | probable tRNA threonylcarbamoyladenosine biosynthesis protein osgep-like              |
| LOC100118618 | NV15033 | -56.87       | 5.09E-013 | ubiA prenyltransferase domain-containing protein 1 homolog                            |
| LOC100114611 | NV17739 | -43.88       | 1.15E-008 | uncharacterized glycosyltransferase AER61-like                                        |
| LOC100122036 | NV13848 | -42.88       | 1.23E-004 | carboxy-terminal domain RNA polymerase II polypeptide A small phosphatase 1-like      |
| LOC100114164 | NV16579 | -38.04       | 4.66E-007 | endoplasmin-like                                                                      |
| LOC100118618 | NV15033 | -37.87       | 8.71E-005 | ubiA prenyltransferase domain-containing protein 1 homolog                            |
| Lin          |         | -37.21       | 6.20E-003 | lines                                                                                 |
| LOC100118618 | NV15033 | -35.85       | 5.06E-004 | ubiA prenyltransferase domain-containing protein 1 homolog                            |
| LOC100122046 | NV12262 | -35.64       | 6.36E-005 | chromodomain-helicase-DNA-binding protein Mi-2 homolog                                |
| LOC100118618 | NV15033 | -35.49       | 6.64E-004 | ubiA prenyltransferase domain-containing protein 1 homolog                            |
| LOC100118618 | NV15033 | -33.79       | 3.11E-003 | ubiA prenyltransferase domain-containing protein 1 homolog                            |
| Atp5b        | NV12146 | -33.12       | 1.01E-002 | ATP synthase, H <sup>+</sup> transporting, mitochondrial F1 complex, beta polypeptide |
| LOC100120295 | NV16720 | -31.33       | 1.90E-002 | uncharacterized LOC100120295                                                          |
| LOC100122200 | NV13851 | -31.29       | 4.61E-003 | frizzled-7-like                                                                       |
| LOC100122869 | NV12317 | -30.35       | 4.22E-002 | carnitine O-palmitoyltransferase 2, mitochondrial-like                                |
| LOC100117948 | NV14276 | -29.45       | 3.87E-002 | zinc finger protein Helios-like                                                       |
| LOC100114164 | NV16579 | -27.28       | 1.60E-004 | endoplasmin-like                                                                      |
| LOC100118618 | NV15033 | -25.32       | 2.02E-004 | ubiA prenyltransferase domain-containing protein 1 homolog                            |
| LOC100123019 | NV11527 | -23.34       | 2.27E-002 | N-acetyltransferase 15-like                                                           |
| LOC100114300 | NV18104 | -22.44       | 5.62E-005 | eukaryotic translation initiation factor 4H-like                                      |
| LOC100115546 | NV15853 | -16.67       | 4.22E-002 | inositol hexakisphosphate and diphosphoinositol-pentakisphosphate kinase-like         |
| LOC100115582 | NV15403 | -12.76       | 1.90E-002 | girdin-like                                                                           |
| LOC100114300 | NV18104 | -12.05       | 1.06E-002 | eukaryotic translation initiation factor 4H-like                                      |
| LOC100113804 | NV13108 | 16.88        | 1.69E-002 | 60S ribosome subunit biogenesis protein NIP7 homolog                                  |
| msn          | NV18625 | 19.27        | 2.92E-004 | misshapen                                                                             |
| LOC100119027 | NV15549 | 20.80        | 4.22E-002 | T-complex protein 1 subunit beta-like                                                 |
| msn          | NV18625 | 20.87        | 5.67E-003 | misshapen                                                                             |
| msn          | NV18625 | 23.39        | 1.48E-004 | misshapen                                                                             |
| msn          | NV18625 | 27.29        | 1.28E-005 | misshapen                                                                             |
| LOC100116941 | NV13337 | 27.52        | 4.22E-002 | HBS1-like protein-like                                                                |
| LOC100122518 | NV14674 | 28.05        | 1.90E-003 | uncharacterized LOC100122518                                                          |

| Gene name    | Gene ID | 5mC Δ  | q-value   | NCBI full name                                                                    |
|--------------|---------|--------|-----------|-----------------------------------------------------------------------------------|
| LOC100119184 | NV12166 | 31.71  | 1.43E-006 | uncharacterized LOC100119184                                                      |
| msn          | NV18625 | 38.63  | 1.02E-005 | misshapen                                                                         |
| Cact2        | NV11366 | 39.24  | 1.09E-009 | NF-kappa-B inhibitor cactus 2                                                     |
| LOC100114102 | NV17553 | 61.14  | 3.68E-003 | uncharacterized LOC100114102                                                      |
| Brm          | NV11766 | 72.94  | 6.19E-003 | ATP-dependent helicase brahma                                                     |
| LOC100118729 | NV14558 | 75.71  | 3.35E-007 | nodal modulator 1-like                                                            |
| LOC100118687 | NV14557 | 75.71  | 3.35E-007 | uncharacterized LOC100118687                                                      |
| LOC100115227 | NV16159 | 79.82  | 1.01E-008 | ubiquitin C-like                                                                  |
| LOC100121209 | NV13544 | 84.41  | 1.96E-006 | ubiquitin carboxyl-terminal hydrolase 36-like                                     |
| LOC100679730 |         | 89.35  | 4.60E-011 | protein cappuccino homolog                                                        |
| LOC100117025 | NV15224 | 89.35  | 4.60E-011 | dolichyl-diphosphooligosaccharide--protein glycosyltransferase subunit STT3B-like |
| mor          | NV13586 | 89.87  | 1.15E-004 | moira                                                                             |
| WDR36        |         | 94.74  | 1.15E-008 | WD repeat domain 36                                                               |
| LOC100680213 |         | 97.73  | 8.74E-008 | uncharacterized LOC100680213                                                      |
| LOC100119692 | NV18435 | 97.73  | 8.74E-008 | WD repeat-containing protein 20-like                                              |
| LOC100117821 | NV50484 | 99.26  | 3.00E-030 | zinc finger protein 132-like                                                      |
| LOC100117390 | NV18148 | 100.00 | 1.56E-010 | PERQ amino acid-rich with GYF domain-containing protein 2-like                    |

**Table S2.** Sequence and coordinates of oligonucleotides used in qPCR for RRBS validation, and 5hmC analysis.

| Gene<br>(primer used)             | Forward primer (5'-3')             | Reverse primer (5'-3')         | Gene ID<br>(NCBI) | Coordinates             | Amplicon<br>size (bp) |
|-----------------------------------|------------------------------------|--------------------------------|-------------------|-------------------------|-----------------------|
| MSN                               | CATTTATCCGCGATCAA<br>CCT           | AGCTGGCTCATCATCT<br>TCGT       | 341864961         | 17786041-<br>17786183   | 143                   |
| UbiA-1                            | GACCGATATCCGTGCTG<br>TTC           | TCTCGAGGTCCCTGGT<br>ATTG       | 341864959         | c29619956-<br>29620087  | 132                   |
| Cact2                             | GGACAAACAGCAGGTGG<br>ATT           | GCAAGCCTTAGCAGGT<br>TCAG       | 341864958         | c 2065624-<br>2065771   | 148                   |
| LOC100117821<br>Pre-amplification | TTGGTTATGTTATATG<br>GTTATTTAG      | TATCTACTAACAACCTC<br>TCATTCATC | 341864960         | c7593895-<br>7593681    | 215                   |
| Discriminative                    | TATGGTTATTTAG/id<br>eoxyI/GGTTT+C  | TCTAATCCTAATTATT<br>ATTAACC    |                   | c7593883-<br>7593782    | 102                   |
| Non-<br>discriminative            | TATGGTTATTTAG/id<br>eoxyI/GGTTT    |                                |                   |                         |                       |
| WDR36<br>Pre-amplification        | TAATTTGGGGATTTTTTT<br>TGTGG        | TCAATATTCAACAAAT<br>TCAACCAAC  | 341864959         | c 30423392-<br>30423117 | 276                   |
| Discriminative                    | GTTATTTTAGATTTTTTT<br>AGATAGTA+C   | TAACCAAACAAACAT<br>AATAAC      |                   | c 30423277-<br>30423148 | 130                   |
| Non-<br>discriminative            | GTTATTTTAGATTTTTTT<br>AGATAGTA     |                                |                   |                         |                       |
| LOC100117390<br>Pre-amplification | TTATTTGTAAAAATGTA<br>TTTTTTTT      | ATTATAACACCAATTA<br>ATTCTACTC  | 341864961         | 14674461-<br>14674739   | 279                   |
| Discriminative                    | GTTTG/ideoxyI/<br>GAATTAGTTGGATT+C |                                |                   | 14674567-<br>14674679   |                       |
| Non-<br>discriminative            | GTTTG/ideoxyI/GAA<br>TTAGTTGGAT    | ATAACTTATTAATAAC<br>ACTTACCC   |                   |                         | 113                   |

**Fig. S1. Validation of differential methylation by qPCR.** Differential methylation of specific cytosine in three genes was tested by MethylQuant, a qPCR approach (Thomassin,H. 2004). Boxplot showing the median and 95% confidence limits of the sample ratios calculated by permutation using the qpcR library of the R software. All loci show a significant increase in methylation in long day, in accordance with the RRBS analysis.

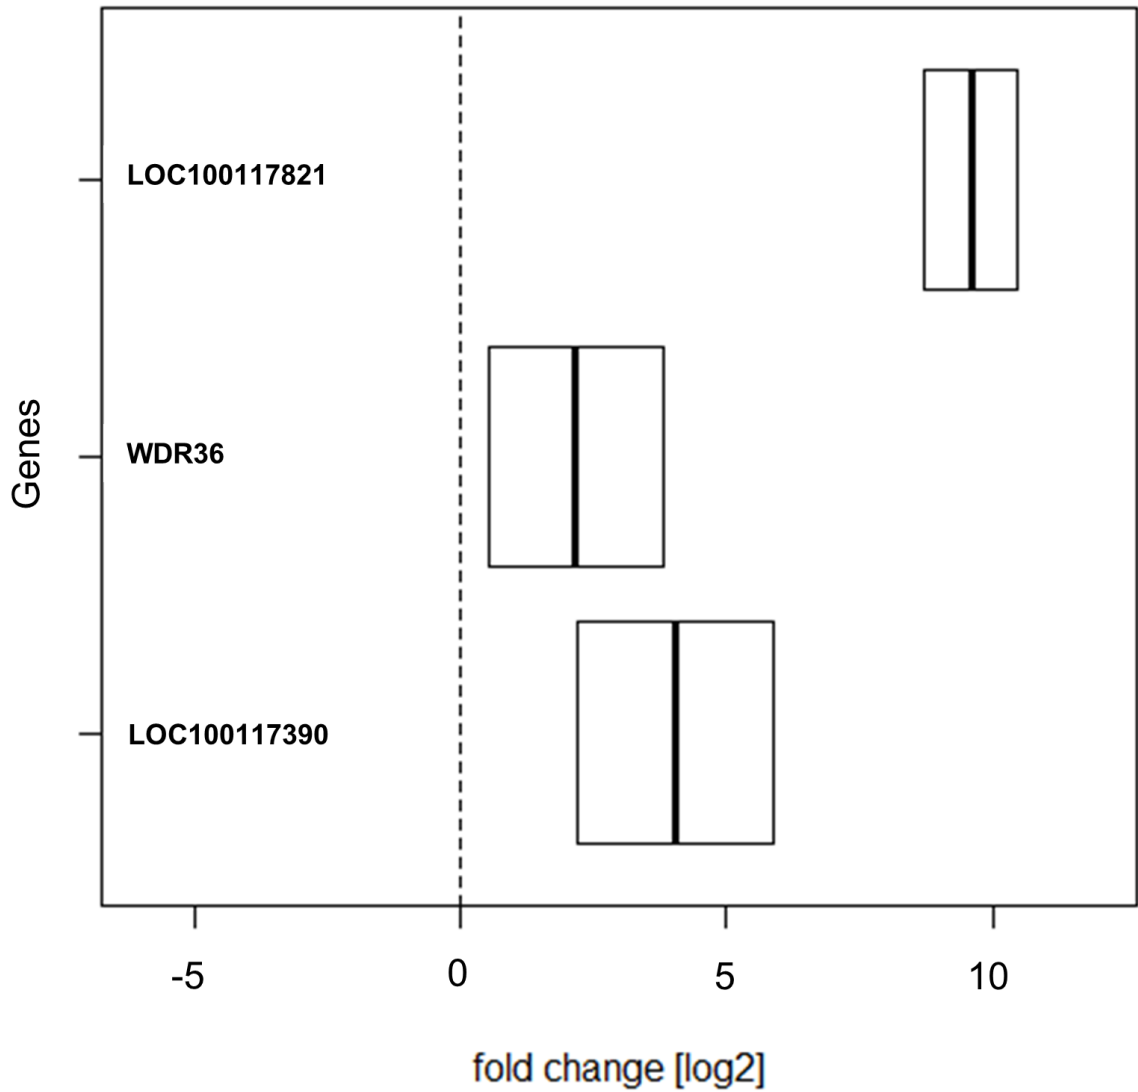

**Fig. S2. Levels of 5-hydroxymethylation in candidate genes.** *Nasonia* genomic DNA (spiked with mouse DNA) was analysed by hMeDIP using antibodies against 5hmC.

Immunoprecipitated DNA was amplified by gene-specific q-PCR. The mouse gene *GAPDH* and *Tex19* serves as negative and positive controls respectively. Three independent experiments are shown.

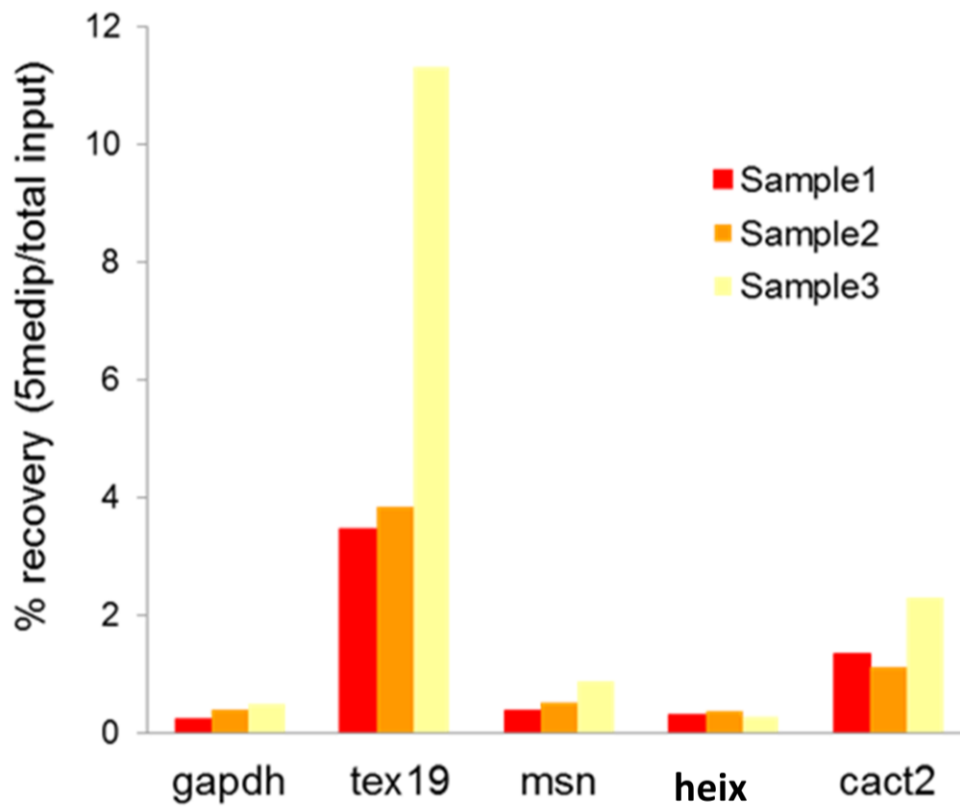

**Fig. S3. Validation of knock-down of DNMTs.** The normalized expression level of **A. Dnmt1a** **B. Dnmt1b** **C. Dnmt1c** and **D. Dnmt3** were compared in the treated group (n=30; white boxplots) to the control group (n=30, grey box plots). The line inside each box represents the median, the top and the bottom the 75 and 25th percentiles respectively, error bars range from minimum to maximum (excluding outliers). Significance codes as per TukeyHSD (ANOVA): 0 '\*\*\*\*' 0.001 '\*\*' 0.01 '\*' 0.05 '.' 0.1 '.' 1

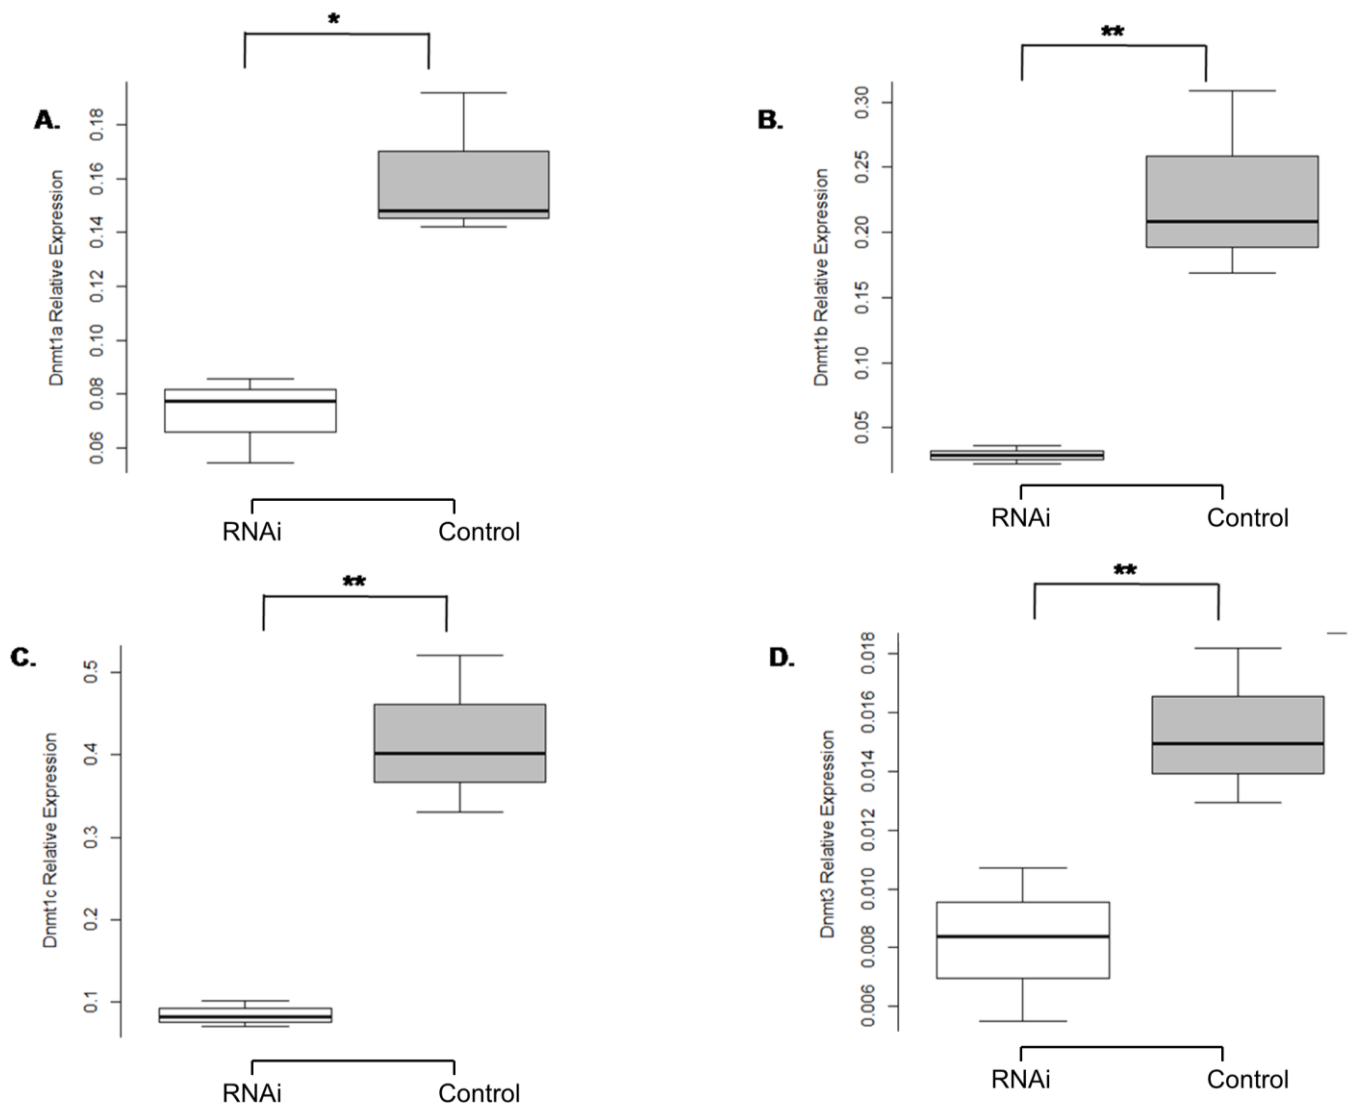

**Fig. S4. Level of Diapause after *DNMTs* knock-down.** The progeny of females injected with *Dnmt1b* and *Dnmt1c* dsRNAi was tested after 5 days at 18°C. In both cases normal photoperiodic response typical of *Nasonia* was observed: low diapause incidence induced in long day (LD, 18 hr light, white box) compared with short day (SD, 6 hr light, grey box) is seen. 18-20 females in each group, progeny of each female collected from two hosts, average n=24 larvae per female. The line inside each box represents the median, the top and the bottom the 75 and 25th percentiles respectively, error bars range from minimum to maximum (excluding outliers). Significance Codes as per TukeyHSD (ANOVA): 0 '\*\*\*\*' 0.001 '\*\*' 0.01 '\*' 0.05 '.' 0.1' ' 1.

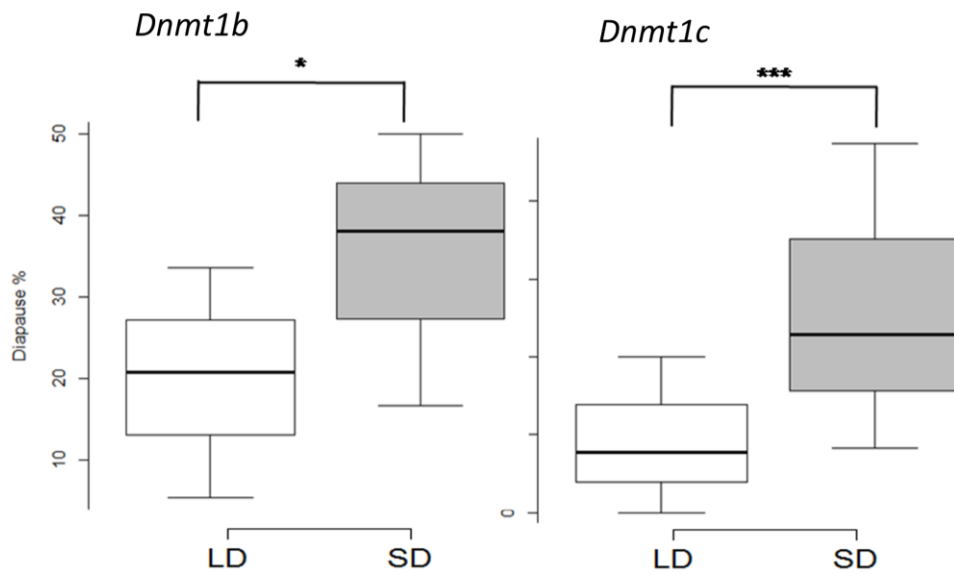

**Fig. S5. Reduced methylation after knockdown of Dnmt1a (bottom) and Dnmt3 (top).** Boxplots depict the distribution of the replicates and the error estimated through permutation using the qpcR library of the R software. The dotted line describes the value for which the ratio is one (i.e. no difference in methylation). Differential methylation of specific cytosine in each genes was tested by MethylQuant, a qPCR approach (Thomassin. 2004).

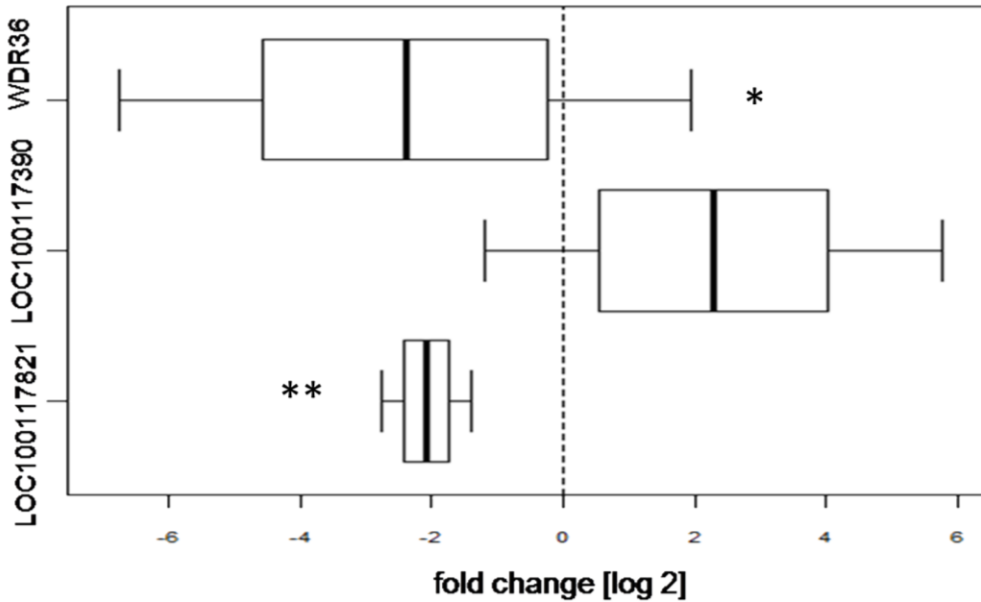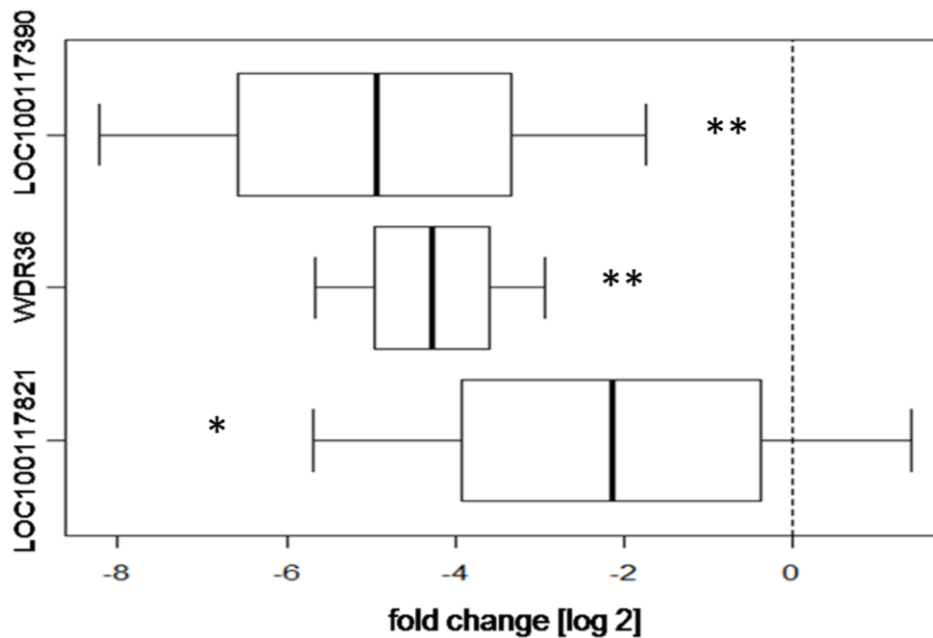

Supplement: supp_gr.196204.115_Supplemental_lMaterial.pdf [file supp_gr.196204.115_Supplemental_lMaterial.pdf]
